# Supplementary material for: Long-term safety and efficacy of elexacaftor/tezacaftor/ivacaftor in people with cystic fibrosis and at least one F508del allele: 144-week interim results from a 192-week open-label extension study
Source: PubMed Central journal article supplement — Eur Respir J. 2023 Dec 7;62(6):2202029. doi: 10.1183/13993003.02029-2022 (PMC10701091; doi:10.1183/13993003.02029-2022), 2023-12-07
Supplement: ERJ-02029-2022.Supplement.pdf [file ERJ-02029-2022.Supplement.pdf]

**Long-Term Safety and Efficacy of Elexacaftor/Tezacaftor/Ivacaftor in People With Cystic Fibrosis and at Least One *F508del* Allele: 144-Week Interim Results From a 192-Week Open-Label Extension Study**

Cori L. Daines,<sup>1\*</sup> Elizabeth Tullis,<sup>2\*</sup> Stefano Costa,<sup>3</sup> Rachel W. Linnemann,<sup>4</sup> Marcus A. Mall,<sup>5,6,7</sup> Edward F. McKone,<sup>8</sup> Deepika Polineni,<sup>9</sup> Bradley S. Quon,<sup>10</sup> Felix C. Ringshausen,<sup>11</sup> Steven M. Rowe,<sup>12</sup> Hiran Selvadurai,<sup>13</sup> Jennifer L. Taylor-Cousar,<sup>14</sup> Nicholas J. Withers,<sup>15</sup> Neil Ahluwalia,<sup>16</sup> Samuel M. Moskowitz,<sup>16</sup> Valentin Prieto-Centurion,<sup>16</sup> Yaoyuan Vincent Tan,<sup>16</sup> Simon Tian,<sup>16</sup> Tanya Weinstock,<sup>16</sup> Fengjuan Xuan,<sup>16</sup> Yaohua Zhang,<sup>16</sup> Bonnie Ramsey,<sup>17\*\*</sup> and Matthias Griese<sup>18\*\*</sup> for the VX17-445-105 Study Group

<sup>1</sup>University of Arizona, Banner University Medical Center, Tucson, AZ, USA; <sup>2</sup>St. Michael's Hospital, Toronto, ON, Canada; <sup>3</sup>Univeristy of Messina, Messina, Italy; <sup>4</sup>Emory University, Atlanta, GA, USA; <sup>5</sup>Charité–Universitätsmedizin Berlin, Berlin, Germany; <sup>6</sup>Berlin Institute of Health, Berlin, Germany; <sup>7</sup>German Center for Lung Research, Berlin, Germany; <sup>8</sup>St. Vincent's University Hospital, Dublin, Ireland; <sup>9</sup>Washington University in St. Louis, St. Louis, MO, USA; <sup>10</sup>UBC and St. Paul's Hospital, Vancouver, BC, Canada; <sup>11</sup>Hannover Medical School and German Center for Lung Research, Hannover, Germany; <sup>12</sup>University of Alabama at Birmingham, Birmingham, AL, USA; <sup>13</sup>The Children's Hospital at Westmead, Australia; <sup>14</sup>National Jewish Health, Denver, CO, USA; <sup>15</sup>Royal Devon and Exeter NHS Foundation Trust, Exeter, UK; <sup>16</sup>Vertex Pharmaceuticals Incorporated, Boston, MA,

USA; <sup>17</sup>Seattle Children's Hospital, Seattle, WA, USA; <sup>18</sup>Ludwig Maximilian Univ. and German Center for Lung Research, Munich, Germany

\*Drs. Daines and Tullis contributed equally to this work.

\*\*Drs. Ramsey and Griese contributed equally to this work.

## Contents

|                                                                                                                                                                                        |           |
|----------------------------------------------------------------------------------------------------------------------------------------------------------------------------------------|-----------|
| <b>List of Site Investigators, Study Coordinators and Study Nurses</b> .....                                                                                                           | <b>4</b>  |
| <b>Supplementary Methods</b> .....                                                                                                                                                     | <b>13</b> |
| Study Inclusion Criteria .....                                                                                                                                                         | 13        |
| Study Exclusion Criteria .....                                                                                                                                                         | 13        |
| Study Design .....                                                                                                                                                                     | 14        |
| Dosing .....                                                                                                                                                                           | 15        |
| Adverse Events .....                                                                                                                                                                   | 15        |
| Statistical Analysis .....                                                                                                                                                             | 17        |
| <b>Supplementary Figure</b> .....                                                                                                                                                      | <b>19</b> |
| Figure S1. Study Design .....                                                                                                                                                          | 19        |
| <b>Supplementary Tables</b> .....                                                                                                                                                      | <b>20</b> |
| Table S1. Additional Baseline Characteristics of the Participants* .....                                                                                                               | 20        |
| Table S2. Adverse Events Occurring in >5% of Participants .....                                                                                                                        | 22        |
| Table S3. Summary of Most Common Adverse Events (>15% at Week 144) at Weeks 48, 96, and 144.....                                                                                       | 22        |
| Table S4. Liver Function Test Enzyme Elevations and Adverse Events of Elevated Transaminases ....                                                                                      | 28        |
| Table S5. Summary of Rash Events* .....                                                                                                                                                | 30        |
| Table S6. Adverse Events of Blood Creatine Phosphokinase Increased .....                                                                                                               | 32        |
| Table S7. Summary of Blood Pressure Data.....                                                                                                                                          | 33        |
| Table S8. Adverse Events Related to Blood Pressure* .....                                                                                                                              | 34        |
| Table S9. Annualised Rate of Change in ppFEV <sub>1</sub> * .....                                                                                                                      | 35        |
| Table S10. Incidence of depression and depression-related adverse events in ELX/TEZ/IVA pivotal phase 3 trial (Study 445-102) and in the ELX/TEZ/IVA pooled clinical trial data* ..... | 36        |
| <b>References</b> .....                                                                                                                                                                | <b>38</b> |
| <b>Data Sharing Statement</b> .....                                                                                                                                                    | <b>39</b> |

## **List of Site Investigators, Study Coordinators and Study Nurses**

The VX17-445-105 Study Group included Peter Middleton, Tracey Burns and Cassandra Thompson (Westmead Hospital, Westmead, NSW, Australia); Lucy Burr, Kate Hindmarsh, Megan Martin, Courtney Moloney and Maddy Simson (Mater Misericordiae Ltd, South Brisbane, QLD, Australia); Andrew Tai, Antonia Chan, Yi Yuan and Rebecca Zyweck (Women & Children's Hospital, North Adelaide, SA, Australia); Philip Robinson, Hiep Pham, Thomas Saunders, Carli McClure, Stephanie Riley and Julie Smith (The Royal Children's Hospital, Melbourne, VIC, Australia); Hiranjan (Hiran) Selvadurai, Dominic Fitzgerald, Chetan Pandit, Paul Robinson, Samantha Forbes and Karen McKay (The Children's Hospital at Westmead, Westmead, WA, Australia); Ernst Eber, Markus Egger, Andreas Pflieger, Katrin Borstner, Lucia Jimenez Garcia, Gerlinde Eckhart, Rosa Etschmaier, Maria Gaber, Andreas Grießl, Astrid Hulka, Christine Rass, Anja Maria Schaffer and Eveline Weger (University of Graz, Graz, Austria); Helmut Ellemunter, Dorothea Appelt, Johannes Eder, Teresa Fuchs, Katharina Niedermayr, Nikelwa Theileis and Verena Gasser (Medizinische Universität Innsbruck, Innsbruck, Austria); Michael Studnicka, Lukas Denkmayr, Nathalie Firlei-Fleischmann, Franziska Jordan, Erich Traugott and Gertraud Weiß (Uniklinikum Salzburg - Universitätsklinik für Pneumologie/Lungenheilkunde, Salzburg, Austria); Eleonora Dehlink, Saskia Gruber, Sabine Renner, Eva Wissmann, Brigitte Mersi and Christina Wittmann (Medizinische Universität Wien, Wien, Austria); Elke De Wachter, Siel Daelemans, Linde Peeters, Jelle Smet, Dimitri Stylemans, Eef Vanderhelst, Stefanie Vincken, Karolien Bruneel, Annick Christiaens and Christel Van den Brande (Universitair Ziekenhuis Brussel - Campus Jette, Brussels, Belgium); Christiane Knoop, Isabelle Etienne and Liliane Collignon (Cliniques Universitaires de Bruxelles Hopital Erasme, Brussels, Belgium); Stijn Verhulst, Hilde Stevens and Monika Waskiewicz (Universitair

Ziekenhuis Antwerpen (UZA) - Antwerp University Hospital, Edegem, Belgium); Eva Van Braeckel, Yannick Vande Weygaerde, Anja Delporte, Benedicte Demeyere and Stefanie Vermeersch (Universitair Ziekenhuis Gent, Ghent, Belgium); Francois Vermeulen, Mieke Boon, Marijke Proesmans, Linda Boulanger, Nathalie Feyaerts and Marianne Schulte (Universitaire Ziekenhuizen Leuven - Campus Gasthuisberg, Leuven, Belgium); Michael Parkins, Kate Skolnik, Ranjani Somayaji, Ashten Langevin and Clare Smith (University of Calgary Medical Clinic of the Foothills Medical Centre, Calgary, AB, Canada); Mark Chilvers, Sharon Dell, Jonathan Rayment, Alam Lakhani and Nazifaa Vasaya (British Columbia Children's Hospital, Vancouver, BC, Canada); Bradley Quon, Taryn Leach and Leeanne Parris (St. Paul's Hospital, Vancouver, BC, Canada); Felix Ratjen, Sheryl Hewko and Stephanie Jeanneret-Manning (The Hospital for Sick Children, Toronto, ON, Canada); Larry Lands, Paul Brunache and Tracy Mercier (McGill University Health Centre, Glen Site, Montreal Children's Hospital, Montreal, QC, Canada); Patrick Daigneault, Louise Gosselin, Marie-France Nolin and Nadie Rioux (Centre Hospitalier de Quebec - Universite Laval, Quebec, QC, Canada); Lukas Homola, Miriam Mala, Gabriela Fialova and Alena Kucernakova (Klinika Detskych Infekcnich Nemoci, Brno, Czech Republic); Pavel Drevinek (Dřevínek), Libor Fila, Martina Vichova, Alena Bilkova, Lucie Borek-Dohalska, Jitka Bratrsovska, Venuse Flegrova and Olga Jankova (Fakultni nemocnice v Motole, Praha, Czech Republic); Stephanie Bui, Theo Levrault, Virginie Saintignan, Florence Valentin and Oceane Zaghet (Groupe Hospitalier Pellegrin, CHU De Bordeaux, Bordeaux, France); Nadine Dufeu, Bérengère (Berengere) Coltey, Geneviève Mouton-Schneider, Yasmine Namouri, Selia Yaker, Isabelle Chambre and Amandine Melis (CHU Marseille - Hopital Nord, Marseille, France); Sylvie Leroy, Michèle Ben Hayoun, Marie Giannantonio, Johana Pradelli, Monique Albert, Faten Amamou Elhani, Luc Froissant, Jennifer Griffonnet, Aline Joulie, Lorène

Philibert, Virginie Roux and Sophie Varenio (Centre Hospitalier Universitaire (CHU) de Nice - Hopital Pasteur, Nice, France); Isabelle Fajac, Frederique Aubourg, Hafidha Amari, Rim Ben Mbarek, Celine Pires, Jessica Decagny and Marie Munet (Hopital Cochin, Paris, France); Isabelle Durieu, Stéphane Durupt, Raphaela Nove-Josserand, Emilie Mathiotte and Jessica Rousson-Biau (Centre Hospitalier Lyon Sud, Pierre-Bénite, France); Christophe Marguet, Laure Couderc, Stephane Dominique and Carine Choubrac (CHU de Rouen - Hopital Charles Nicolle, Rouen, France); Dominique Grenet, Sandra De Miranda and Beatrice D'Urso (Hopital Foch (Suresnes), Hopital Foch, Adultes, Suresnes, France); Renate Ruppel, Evelin Muschiol, Lena Reuss and Ines Yawa (Friedrich-Alexander University of Erlangen-Nuremberg, University Children's Hospital, Erlangen, Germany); Lutz Nährlich, Azadeh Bagheri-Potthoff, Julia Westhoff, Claudia Rueckes-Nilges, Bianca von Stoutz and Nadine Mühlig (Justus-Liebig-Universität Gießen Zentrum für Kinderheilkunde und Jugendmedizin, Giessen, Germany); Felix Ringshausen, Isabelle Pink and Natascha Scharf (Hannover Medical School, Hannover, Germany); Olaf Sommerburg, Ines Kirsch, Iris Kühbandner and Tatjana Uselmann (Heidelberg Cystic Fibrosis Center, Heidelberg, Germany); Krystyna Poplawska and Melanie Kleinhans (Johannes Gutenberg-Universitaet, Mainz, Germany); Matthias Griese, Florian Gesenhues, Ingo Pawlita, Franziska Sattler, Elias Seidl, Mandeep Kaur and Daniela Sebah (Dr. von Haunersches Kinderspital, München, Germany); Ute Graepler-Mainka, Joachim Rupprecht, Phillip Utz, Hiltrud Mayer and Susanne Schwartz (Universitätsklinikum Tübingen Klinik für Kinder- und Jugendmedizin, Tuebingen, Germany); Helge Hebestreit, Daniela d'Alquen, Alexandra Hebestreit, Corinne Koenig, Anna Schneiderbanger, Elena Fries and Martina Popp (University Hospital Wuerzburg, Würzburg, Germany); Filia Diamantea, Elvira-Markela Antonogiannaki, Dimitrios Papadopoulos, Sophia Pouriki and Theoni Papageorgakopoulou (General Hospital of

Attika 'Sismanoglio' (Adult CF center, NHS), Attica, Greece); Benedetta Fabrizzi, Nicole Caporelli, Natalia Cirilli and Vanessa Rochira (Azienda Ospedaliero Universitaria Ospedali Riuniti di Ancona, Ancona, Italy); Rosaria Casciaro, Carlo Castellani, Federico Cresta, Silvia Garuti and Maria Lombardi (IRCCS Istituto Giannina Gaslini-Ospedale Pediatrico, Genoa, Italy); Stefano Costa, Simona Cristadoro, Maria Ausilia Catena and Alessia Grifo (Azienda Ospedaliera Universitaria Policlinico G. Martino, Messina, Italy); Giovanni Taccetti, Anna Silvia Neri and Michela Francalanci (Azienda Ospedaliero Universitaria Ospedale Pediatrico Meyer, Messina, Italy); Carla Colombo, Laura Elisabetta Claut, Fabiola Corti, Valeria Dacco, Nadia Faelli, Erica Carolina Nazzari, Maria Russo, Laura Zazzeron, Arianna Bisogno, Gianluca Conte and Ilaria Coro (Fondazione IRCCS Ca' Granda Ospedale Maggiore Policlinico, Milan, Italy); Donatello Salvatore, Fabiola De Gregorio and Carmela Colangelo (Centro Regionale Fibrosi Cistica, A.O. Ospedale San Carlo, Potenza, Italy); Paola Melotti, Elena Spinelli, Sonia Volpi, Mariaserena Boraso and Ilaria Meneghelli (Azienda Ospedaliera di Verona - Ospedale Civile Maggiore, Verona, Italy); Josje Altenburg, Suzanne Terheggen-Lagro, Els Weersink, Nora Adriaens and Saeeda Lone Latif (Academisch Medisch Centrum (Academic Medical Centre), Amsterdam, Netherlands); Petrus (Peter) Merkus, Monique Reijers, Jolt Roukema, Lara Van der Wijngaart, Femke Cuppen, Nicole Keijzers-Gerrits, Laura Lubbers and Cindy Tonen (UMC St. Radboud, Nijmegen, Netherlands); Lieke Kamphuis, Marleen Bakker, Rogier Hoek, Kirsten Korte, Menno Van der Eerden, Marjolein Gerrits-Boeije, Louise van Hove and Lobke Lanser (Erasmus Medical Center, Rotterdam, Netherlands); Renske van der Meer, Hassan El Bouazzaoui, Annemarie Van Den Berg, Margot Eggermont and Ilonka Paalvast (HagaZiekenhuis van den Haag, The Hague, Netherlands); Harry Heijerman, Bente Aalbers, Bert Arets, Marlou Bierlaagh, Regina Hofland, Stephan Jans, Sabine Michel and Hannah van Panhuis

(University Medical Center, Utrecht, Department of Pulmonology and Tuberculosis, Utrecht, Netherlands); Lena Hjelte, Adrienn Bánki, Isabelle Monestrol, Maria Rönnqvist, Mahasin Shakirchi, Anna Hollander and Sten Salomonsson (Karolinska Universitetssjukhuset, Huddinge, Stockholm, Sweden); Damian Downey, Stephen Caskey, Roisin Stone and Sophie Cadman (Belfast City Hospital, Belfast, United Kingdom); Joanna Whitehouse, James Whitehouse and Joseph Nyaboko (University Hospitals Birmingham NHS Foundation Trust, Birmingham, United Kingdom); Robert Gray, Helen Rodgers, Antonia Tasiou, Jenny Hartley, Heather Kilarski, Ruth Moss, Kate Ritchie and Aysha Parveen (Western General Hospital, Edinburgh, United Kingdom); Nicholas Withers, Lee Dobson, Beth Enderby, Philip Mitchelmore, Patrick Oades, Sinead Kelly, Evanna McEvoy, Stephanie Prince, Sophie Whiteley and Suzanne Wilkins (Royal Devon and Exeter NHS Foundation Trust, Royal Devon and Exeter Hospital, Exeter, United Kingdom); Timothy Lee, Christopher Edwards, Saikiran Gopalakaje, Emma Guy, Trevor Milligan and Neil Hall (Leeds General Infirmary, Leeds, United Kingdom); Patricia Macedo, Cara Bossley, Rossa Brugha, Gary Ruiz, Michael Waller, Adedamola Adebayo, Hannah Fletcher, Tracey Fong, Agnes Scheepers, Eniola Nsirim and Katie Tupper (King's College Hospital, London, United Kingdom); Anirban Maitra, Anna Shawcross, Jill Wilson, Charlotte Boe, Natalie Hill and Sarah Sampson (Royal Manchester Children's Hospital, Manchester, United Kingdom); Julian Legg, Ioannis Anastasiou, Mary Carroll, Shobonna Akhter, Lisa Fairhead, Donna Bowens, Rebecca Cartwright, Elizabeth Fofana, Lorraine Hewitt and Natasha Tucker (Southampton General Hospital, Southampton, United Kingdom); Larry Johnson and Kathleen Hicks (University of Arkansas for Medical Sciences, Little Rock, AR, United States); Cori Daines, Tara Carr, Michael Daines, Janell Merchen and Elizabeth Ryan (Banner University of Arizona Medical Center, Tucson, AZ, United States); Jimmy Johannes, Thomas Tao Jiang,



Cyrus Shahrairy, Christopher Yee, Ana Fuentes, Richard Garcia, Marylee Melendrez and Angelica Rodriguez (Miller Children's Hospital / Long Beach Memorial, Long Beach, CA, United States); Thomas Keens, Carmen Reyes, Mark Selleck, Emely Anaya, Esme Mason and Daniel Quevedo (Children's Hospital Los Angeles, Los Angeles, CA, United States); Sudhakar Reddivalam, Pooja Puri and Tamanjit Basi (Children's Hospital Central California - Valley Children's Hospital, Madera, CA, United States); Bryon Quick and Carolyn Beebe (Kaiser Permanente, Oakland, CA, United States); Brian Morrissey, Michelle Occhipinti, Brandt Robinson and Kaelyn Tuermer-Lee (University of California Davis Medical Center, Sacramento, CA, United States); Ngoc Ly, Kellen Brown, Joseph Dang and Courtney Moreno (UCSF Gateway Medical Center, San Francisco, CA, United States); Jennifer Taylor-Cousar, Jerry Nick, Connor Balkisson, Nora Murphy and Alexandra Wilson (National Jewish Health, Denver, CO, United States); Cesar Trillo-Alvarez, Noni Graham, Erin Silverman and Christina Eagan (University of Florida, Shands Hospital, Gainesville, FL, United States); Herschel Scher, Doris Alaby, Norma Jean Barton and Belkis Wandique Rapalo (Joe DiMaggio Cystic Fibrosis & Pulmonary Center, Hollywood, FL, United States); David Schaeffer, Isabel Delgado, Betty DeLuca, Jennifer Gafford, Chelsea Kleweno and Jennifer Wilson (Nemours Children's Specialty Care, Jacksonville, FL, United States); Francisco Calimano and Bert Kesser (Central Florida Pulmonary Group, PA, Orlando, FL, United States); Floyd Livingston, Mariela Dickson and Amanda Darling (Nemours Children's Hospital, Orlando, FL, United States); Kapilkumar Patel, Cassandra Aldi, Tarica McCray, Hyejeong (Fran) Robbibaro, Stacy Stutts, Kristen Grube, Rachel Karlnoski, Danielle Liebenow and Jennifer Yefchak (Tampa General Hospital Cardiac and Lung Transplant Clinic, Tampa, FL, United States); Rachel Linnemann, William (Randy) Hunt, Joy Dangerfield, Eric Hunter and Demetria Meshown Oliver (The Emory Clinic at

Chantilly, Atlanta, GA, United States); Caralee Forseen and Heidi Stapp (Augusta University, Augusta, GA, United States); Manu Jain, Joanne Cullina, Michelle Hinsch Prickett, Anna Lam, Marc Sala, Lori Yoder, Yerim Kim, Erin Lonergan and Rachel Nelson (Northwestern Memorial Hospital, Chicago, IL, United States); Susanna McColley, Joanne Cullina, Adrienne Prestridge-Savant, Vittobai Rangaraj, Larissa Rugg and Steven Ward (Ann & Robert H. Lurie Children's Hospital of Chicago, Chicago, IL, United States); Subramanyam Chittivelu and Ashley Scott (Children's Hospital of Illinois at OSF Saint Francis Medical Center, Cystic Fibrosis Center, Peoria, IL, United States); Deepika Polineni, Michael Crosser, Timothy Dwyer, Michael Lewis, Joel Mermis, Anjulie Quick, Matthias Salathe, Anne Wishna, Lawrence (Larry) Scott and Megan White (University of Kansas Medical Center, Kansas City, KS, United States); Ross Klingsberg and Christine Glynn (Tulane Medical Center, New Orleans, LA, United States); Isabel Neuringer, Laura Batke, Lauren Guthrie, Margot Hardcastle and Sophie Pollinger (Massachusetts General Hospital Cystic Fibrosis Center Clinical Research Center, Boston, MA, United States); Anne Marie Cairns, Rebecca Edwards, Carrie Milliard and Harmony Renna (Maine Medical Partners, Portland, ME, United States); Dana Kissner, Ibrahim Abdulhamid, Zubin Mukadam, Jimmy Cahill, Debra Driscoll and Aleah Hall (Harper University Hospital, Detroit, MI, United States); John McNamara, Priyamvada Balaji, Rachel Leftwich and Hanna Luce (Children's Respiratory and Critical Care Specialists, P.A., Children's Hospitals and Clinics of Minnesota, Minneapolis, MN, United States); Jerimiah Lysinger and Amy Harmala (Billings Clinic, Billings, MT, United States); Scott Donaldson, Jennifer Goralski, George Retsch-Bogart, Laura Beth Rupcich, Alexandria Nesbit and Joshua Harris (UNC Clinical Research Center, Chapel Hill, NC, United States); Peter Murphy and James Melson (Nebraska Medical Center, Omaha, NE, United States); Stanley Fiel, Rebecca Griffith, Debra Connolly and Nancy Martinez

(Morristown Medical Center, Morristown, NJ, United States); Hengameh Raissy and Franceska Kelly (UNM Clinical and Translational Science Center, Albuquerque, NM, United States); Maria Berdella, Anne Kukral, Patricia Walker, Olia Ali and Teresa Demarco (The Cystic Fibrosis Center, Mount Sinai Beth Israel, New York, NY, United States); John Welter, Allen Dozor, Latoya Holness and Armando Ramirez (New York Medical College, Valhalla, NY, United States); Gregory Omlor, Brenda Bourne and Michelle Powers (Akron Children's Hospital, Akron, OH, United States); Maria Indihar and Nicole Hummel (UC Health Holmes, Cincinnati, OH, United States); Erica Roesch, Laura Batke and Tia Rone (Rainbow Babies and Children's Hospital/University Hospitals Cleveland Medical Center, Cleveland, OH, United States); Karen McCoy, Melissa Holtzlander, Stephen Kirkby, Katelyn Krivchenia, Anne May, Sabrina Palcios, Alpa Patel, Lisa Sarzynski, Richard Shell, Rohan Thompson, Terri Johnson, Patti Olson and Laura Raterman (Nationwide Children's Hospital, Columbus, OH, United States); Gary Mueller and Sandra Bartosik (Dayton Children's Hospital, Dayton, OH, United States); Bruce Barnett, Michael Biggin, Benjamin Goldstein, Leah Hughes, Meghan Keaton, Jennifer Ruddy, Stacy Elliott, Kelly Hoot and Kelly Houser (ProMedica Toledo Hospital/Toledo Children's Hospital/Pediatric Pulmonary & Cystic Fibrosis Center, Toledo, OH, United States); Nighat Mehdi, Kellie Jones, Kimberly Farley, Tiffany McCrabb and Ashley Sanders (University of Oklahoma Health Sciences Center, Oklahoma City, OK, United States); Saba Sheikh, Erin Donnelly, Andrew Borowiec and Jean Malpass (Children's Hospital of Philadelphia, Philadelphia, PA, United States); Patrick Flume and Allison Patterson (Medical University of South Carolina, Charleston, SC, United States); Jason Fullmer, Colleen Millian and Chelsea Roman (Dell Children's Medical Group, Austin, TX, United States); Raksha Jain, Lynn Fernandez, Ashley Keller, Maria McLeod and Terri Visnick (The University of Texas

Southwestern Medical Center, Dallas, TX, United States); Deborah Froh, Christie Aderholt and Mary Alice Blackwell (University of Virginia Health System, Charlottesville, VA, United States); Laura Sass, Jose Chocano, Cynthia Epstein, Erin McAndrews and Diana Thomas (Children's Hospital of the King's Daughters, Norfolk, VA, United States); Howard Schmidt, Ryan Hayden and Margaret Lessard (Virginia Commonwealth University Hospital Systems, Children's Pavilion, Richmond, VA, United States); Charlotte Teneback, Heidi Pecott-Grimm and Julie Sweet (Vermont Lung Center, Burlington, VT, United States); Moira Aitken and Teresa Gambol (University of Washington Medical Center, Seattle, WA, United States); Andrew Braun, Vivek Balasubramaniam, Carrie Barker, Richard Cornwell, Darci Pfeil, Heather Potter, Michael Rock, Sophia Chiron Stevens, Will Genthe, Linda Makhholm and Melanie Nelson (University Hospital and UW Health Clinics, Madison, WI, United States); Julie Biller, Nancy Boil, Rose Franco, Amy Blair and Erin Hubertz (CTSI Adult Translational Research Unit/Medical College of Wisconsin/Froedtert Hospital, Milwaukee, WI, United States); Kathryn Moffett and Tammy Clark (West Virginia University, Morgantown, WV, United States).

## **Supplementary Methods**

The trial was conducted in accordance with the Declaration of Helsinki, local applicable laws and regulations and current Good Clinical Practice Guidelines as described by the International Council for Harmonisation.

## **Study Inclusion Criteria**

- Participant (or his or her legally appointed and authorised representative) signed and dated an informed consent form, and, when appropriate, an assent form
- Willing and able to comply with scheduled visits, treatment plan, study restrictions, laboratory tests, contraceptive guidelines and other study procedures
- Did not withdraw consent from a parent study
- Meets  $\geq 1$  of the following criteria:
  - a. Completed study drug treatment in a parent study
  - b. Had a study drug interruption(s) in a parent study but completed study visits up to the last scheduled visit of the Treatment Period of a parent study
- Willing to remain on a stable cystic fibrosis (CF) treatment regimen through completion of study participation

## **Study Exclusion Criteria**

- History of any comorbidity that, in the opinion of the investigator, might confound the results of the study or pose an additional risk in administering study drug(s) to the participant

- History of drug intolerance in a parent study that would pose an additional risk to the participant in the opinion of the investigator. (eg, participants with a history of allergy or hypersensitivity to the study drug.)
- Pregnant or nursing females. Females of childbearing potential must have had a negative pregnancy test at the Day 1 Visit before receiving the first dose of study drug
- Current participation in an investigational drug trial (other than a parent study).  
Participation in a noninterventional trial (including observational studies, registry studies and studies requiring blood collections without administration of study drug) and screening for another Vertex study was permitted

### **Study Design**

Study VX17-445-105 is a Phase 3, multicentre, open-label, single-arm, extension study of the Phase 3 parent studies VX17-445-102 and VX17-445-103 that investigated elexacaftor (ELX) in combination with tezacaftor (TEZ) and ivacaftor (IVA) in participants with CF  $\geq 12$  years of age and either heterozygous for *F508del* and a minimal function mutation (*F/MF*) or homozygous for *F508del* (*F/F*). The total study duration will be approximately 196 weeks from first dose of ELX/TEZ/IVA in this study and includes a 192-week treatment period followed by a 4-week safety follow-up period.

During the trial, the severe acute respiratory syndrome coronavirus 2 (SARS-CoV-2) pandemic led to implementation of a global protocol addendum that enabled in-home assessments to mitigate the varying prohibitions on travel and the limitation of on-site research procedures based on governmental and institutional restrictions. Through this global protocol addendum, safety measures were implemented to provide participants the opportunity to continue

participating in this trial while minimising the risk of SARS-CoV-2 exposure through travel. Participant access to study drug therapy and collection of safety data were prioritised. These operational adjustments aligned with Health Authority guidance, ensuring the protection of participants, investigators and site personnel while maintaining compliance with Good Clinical Practice guidelines and minimising the impact of missed visits on study conduct. Implemented measures were based on country and local regulations, as well as site-level considerations, and included, as applicable, remote consent, shipment of the study drug, virtual study visits, in-home assessments (such as the Cystic Fibrosis Questionnaire–Revised) and remote monitoring. The clinical trial protocol, SARS-CoV-2–related protocol addendum and informed consent forms were approved by independent ethics committees for each region or site, as required by local regulations.

### **Dosing**

All participants receive ELX/TEZ/IVA at the same dose level as was evaluated in the parent studies (Study 445-102 and Study 445-103).

### **Adverse Events**

Study assessments including laboratory tests, electrocardiograms, physical examinations and vital signs were assessed, and those deemed to have clinically significant worsening from baseline were documented as an adverse event (AE). When possible, a clinical diagnosis for the study assessment was provided, rather than the abnormal test result alone (eg, urinary tract infection, anaemia). In the absence of a diagnosis, the abnormal study assessment itself was listed as the AE (eg, bacteria in urine or decreased haemoglobin).

An abnormal study assessment was considered clinically significant if the participant has  $\geq 1$  of the following:

- Concomitant signs or symptoms related to the abnormal study assessment
- Further diagnostic testing or medical/surgical intervention
- A change in the dose of study drug or discontinuation from the study

Repeat testing to determine whether the result is abnormal, in the absence of any of the above criteria, does not necessarily meet clinically significant criteria. The determination of whether the study assessment results are clinically significant was made by the investigator.

A laboratory value that is Grade 4 was automatically considered to be a serious AE. A Grade 4 laboratory value was a serious AE if the participant's clinical status indicates a life-threatening AE.

All AEs were collected from the time the informed consent form is signed until the participant completes study participation. All participants were queried, using nonleading questions, about the occurrence of AEs at each study visit. When possible, a constellation of signs and/or symptoms were identified as one overall event or diagnosis. All AEs for enrolled participants were recorded in the case report form and source document. AEs for participants who were screened but not subsequently enrolled in the study were recorded only in the participant's source documents. The following data were documented for each AE:

- Description of the event
- Classification of 'serious' or 'non-serious'
- Date of first occurrence and date of resolution (if applicable)
- Severity



- Causal relationship of study drug(s)
- Action taken
- Outcome
- Concomitant medication or other treatment given

### **Statistical Analysis**

A total of 506 participants were dosed in this extension study. With the number of participants exposed to ELX/TEZ/IVA, adverse events by preferred term that occur with a frequency of >1% can be ruled out with 95% confidence when zero events are observed in that preferred term. Furthermore, with over 400 participants exposed to ELX/TEZ/IVA for at least 24 weeks, the half-width of the 95% confidence interval for estimating cumulative incidence of pulmonary exacerbations of CF is <6%, assuming an observed incidence of 30%. The baseline value for the long-term safety analysis, unless otherwise specified, was the most recent non-missing measurement (scheduled or unscheduled) collected before the first dose of ELX/TEZ/IVA in the parent study or extension study, as applicable. The baseline value for all efficacy analyses was defined as the most recent non-missing measurement (scheduled or unscheduled) collected before the first dose of the study drug in the parent study. Missing data was assumed to be missing at random, and no imputation of missing data was performed.

The annualised mean rate of change in per cent predicted forced expiratory volume at 1 second (ppFEV<sub>1</sub>) was estimated for participants with *F/MF* and *F/F* genotypes separately, as well as for all participants together (genotype groups pooled), using a linear mixed-effects model with the cumulative efficacy period ppFEV<sub>1</sub> values as the dependent variable. Data obtained in the first 21 days from the first ELX/TEZ/IVA dose were excluded. In addition, participants with <3 non-

missing percentage of predicted FEV<sub>1</sub> measurements or non-missing ppFEV<sub>1</sub> measurements spanning <180 days were excluded as well. The model included time from first dose divided by 336 as fixed effects, age at screening of parent study (<18 vs ≥18 years of age) and sex (male vs female) as covariates, and a random intercept and time as the random effects. The mixed model was estimated using the restricted maximum likelihood method and assuming an unstructured covariance matrix for the random effect errors. The degrees of freedom in the denominator were estimated based on the method of Kenward-Roger (1).

Supplementary Figure

Figure S1. Study Design

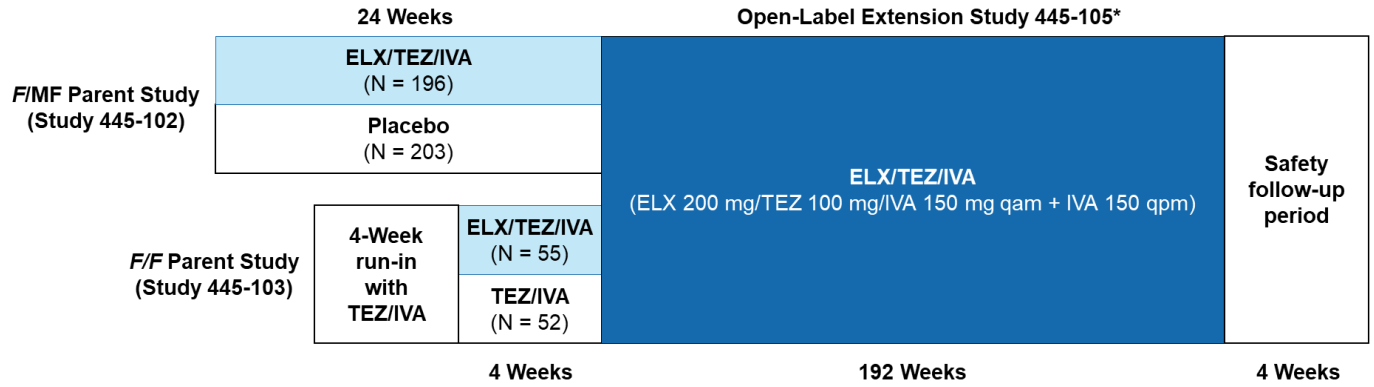

*Definition of abbreviations:* ELX/TEZ/IVA = elexacaftor/tezacaftor/ivacaftor; *F/F* = *F508del-F508del* genotype; *F/MF* = *F508del*-minimal function genotypes; TEZ/IVA = tezacaftor/ivacaftor; qam = once in the morning; qpm = once in the evening.

\* In the extension study, participants received ELX/TEZ/IVA at the same dose level that was evaluated in the parent studies.

Supplementary Tables

Table S1. Additional Baseline Characteristics of the Participants\*

|                                                                                        | Sub-Group of Participants From<br>Parent Study 445-102<br>(F/MF Genotypes) |                        | Sub-Group of Participants From<br>Parent Study 445-103<br>(F/F Genotypes) |                       | All Participants in<br>Study 445-105 |
|----------------------------------------------------------------------------------------|----------------------------------------------------------------------------|------------------------|---------------------------------------------------------------------------|-----------------------|--------------------------------------|
|                                                                                        | Placebo<br>N = 203                                                         | ELX/TEZ/IVA<br>N = 196 | TEZ/IVA<br>N = 52                                                         | ELX/TEZ/IVA<br>N = 55 | ELX/TEZ/IVA<br>N = 506               |
| <i>Pseudomonas aeruginosa</i> infection<br>within 2 years prior to screening, n<br>(%) |                                                                            |                        |                                                                           |                       |                                      |
| Positive                                                                               | 142 (70.0)                                                                 | 147 (75.0)             | 31 (59.6)                                                                 | 39 (70.9)             | 359 (70.9)                           |
| Negative                                                                               | 61 (30.0)                                                                  | 49 (25.0)              | 21 (40.4)                                                                 | 16 (29.1)             | 147 (29.1)                           |
| Prior use of dornase alfa, n (%) <sup>†</sup>                                          |                                                                            |                        |                                                                           |                       |                                      |
| Yes                                                                                    | 164 (80.8)                                                                 | 161 (82.1)             | 49 (94.2)                                                                 | 51 (92.7)             | 425 (84.0)                           |
| No                                                                                     | 39 (19.2)                                                                  | 35 (17.9)              | 3 (5.8)                                                                   | 4 (7.3)               | 81 (16.0)                            |
| Prior use of azithromycin, n (%) <sup>†</sup>                                          |                                                                            |                        |                                                                           |                       |                                      |
| Yes                                                                                    | 114 (56.2)                                                                 | 109 (55.6)             | 25 (48.1)                                                                 | 33 (60.0)             | 281 (55.5)                           |
| No                                                                                     | 89 (43.8)                                                                  | 87 (44.4)              | 27 (51.9)                                                                 | 22 (40.0)             | 225 (44.5)                           |
| Prior use of inhaled antibiotic, n (%) <sup>†</sup>                                    |                                                                            |                        |                                                                           |                       |                                      |
| Yes                                                                                    | 133 (65.5)                                                                 | 118 (60.2)             | 28 (53.8)                                                                 | 35 (63.6)             | 314 (62.1)                           |
| No                                                                                     | 70 (34.5)                                                                  | 78 (39.8)              | 24 (46.2)                                                                 | 20 (36.4)             | 192 (37.9)                           |
| Prior use of any bronchodilator, n<br>(%) <sup>†</sup>                                 |                                                                            |                        |                                                                           |                       |                                      |
| Yes                                                                                    | 192 (94.6)                                                                 | 184 (93.9)             | 47 (90.4)                                                                 | 54 (98.2)             | 477 (94.3)                           |
| No                                                                                     | 11 (5.4)                                                                   | 12 (6.1)               | 5 (9.6)                                                                   | 1 (1.8)               | 29 (5.7)                             |
| Prior use of any inhaled                                                               |                                                                            |                        |                                                                           |                       |                                      |

|                                                                 |              |              |              |              |              |
|-----------------------------------------------------------------|--------------|--------------|--------------|--------------|--------------|
| bronchodilator, n (%) <sup>†</sup>                              |              |              |              |              |              |
| Yes                                                             | 192 (94.6)   | 184 (93.9)   | 47 (90.4)    | 54 (98.2)    | 477 (94.3)   |
| No                                                              | 11 (5.4)     | 12 (6.1)     | 5 (9.6)      | 1 (1.8)      | 29 (5.7)     |
| Prior use of any inhaled hypertonic saline, n (%) <sup>†</sup>  |              |              |              |              |              |
| Yes                                                             | 130 (64.0)   | 147 (75.0)   | 43 (82.7)    | 38 (69.1)    | 358 (70.8)   |
| No                                                              | 73 (36.0)    | 49 (25.0)    | 9 (17.3)     | 17 (30.9)    | 148 (29.2)   |
| BMI-for-age z-score, mean (SD)<br>(participants aged ≤20 years) | -0.40 (0.98) | -0.37 (0.80) | -0.53 (0.91) | -0.37 (0.77) | -0.40 (0.88) |

*Definition of abbreviation:* BMI = body mass index; ELX/TEZ/IVA = elexacaftor/tezacaftor/ivacaftor; TEZ/IVA =

tezacaftor/ivacaftor.

\* Baseline is defined as the most recent non-missing measurement before the first dose of study drug in the parent study treatment period. The open-label full analysis set is defined as all enrolled participants who received  $\geq 1$  dose of study drug in the open-label extension study.

<sup>†</sup> Includes medications started 56 days prior to the first dose of study drug in the treatment period.

**Table S2. Adverse Events Occurring in >5% of Participants**

| Preferred Term                                      | Study 445-102<br>Placebo<br>N = 201 |              | Study 445-102<br>ELX/TEZ/IVA<br>N = 202 |              | Study 445-105<br>ELX/TEZ/IVA<br>N = 506 |              |
|-----------------------------------------------------|-------------------------------------|--------------|-----------------------------------------|--------------|-----------------------------------------|--------------|
|                                                     | n (%)                               | Events/100PY | n (%)                                   | Events/100PY | n (%)                                   | Events/100PY |
| Participants with any AEs                           | 193 (96.0)                          | 1287.96      | 188 (93.1)                              | 1096.01      | 500 (98.8)                              | 586.55       |
| Infective pulmonary exacerbation of cystic fibrosis | 95 (47.3)                           | 181.13       | 44 (21.8)                               | 64.88        | 225 (44.5)                              | 37.40        |
| Cough                                               | 77 (38.3)                           | 113.08       | 34 (16.8)                               | 38.93        | 212 (41.9)                              | 30.63        |
| Headache                                            | 30 (14.9)                           | 42.03        | 35 (17.3)                               | 48.91        | 166 (32.8)                              | 18.29        |
| Oropharyngeal pain                                  | 25 (12.4)                           | 26.02        | 20 (9.9)                                | 26.95        | 146 (28.9)                              | 16.85        |
| Nasopharyngitis                                     | 26 (12.9)                           | 34.03        | 22 (10.9)                               | 29.95        | 135 (26.7)                              | 17.04        |
| Pyrexia                                             | 19 (9.5)                            | 25.02        | 17 (8.4)                                | 17.97        | 134 (26.5)                              | 12.59        |
| Sputum increased                                    | 39 (19.4)                           | 47.03        | 40 (19.8)                               | 46.91        | 120 (23.7)                              | 12.09        |
| Upper respiratory tract infection                   | 22 (10.9)                           | 26.02        | 24 (11.9)                               | 29.95        | 111 (21.9)                              | 11.65        |
| Nasal congestion                                    | 15 (7.5)                            | 18.01        | 19 (9.4)                                | 20.96        | 106 (20.9)                              | 10.08        |
| Fatigue                                             | 20 (10.0)                           | 22.02        | 9 (4.5)                                 | 8.98         | 104 (20.6)                              | 11.21        |
| COVID-19                                            | 0 (0)                               | 0            | 0 (0)                                   | 0            | 99 (19.6)                               | 7.70         |

| Preferred Term                         | Study 445-102<br>Placebo<br>N = 201 |              | Study 445-102<br>ELX/TEZ/IVA<br>N = 202 |              | Study 445-105<br>ELX/TEZ/IVA<br>N = 506 |              |
|----------------------------------------|-------------------------------------|--------------|-----------------------------------------|--------------|-----------------------------------------|--------------|
|                                        | n (%)                               | Events/100PY | n (%)                                   | Events/100PY | n (%)                                   | Events/100PY |
| Nausea                                 | 14 (7.0)                            | 17.01        | 16 (7.9)                                | 15.97        | 84 (16.6)                               | 7.77         |
| Diarrhoea                              | 14 (7.0)                            | 23.02        | 26 (12.9)                               | 31.94        | 80 (15.8)                               | 6.64         |
| Haemoptysis                            | 28 (13.9)                           | 42.03        | 11 (5.4)                                | 11.98        | 78 (15.4)                               | 12.03        |
| Vaccination complication               | 0 (0)                               | 0            | 0 (0)                                   | 0            | 78 (15.4)                               | 9.52         |
| Rhinorrhoea                            | 6 (3.0)                             | 7.01         | 17 (8.4)                                | 18.97        | 69 (13.6)                               | 5.95         |
| Alanine aminotransferase increased     | 7 (3.5)                             | 8.01         | 20 (9.9)                                | 21.96        | 68 (13.4)                               | 5.45         |
| Constipation                           | 12 (6.0)                            | 12.01        | 6 (3.0)                                 | 5.99         | 68 (13.4)                               | 5.64         |
| Arthralgia                             | 7 (3.5)                             | 10.01        | 7 (3.5)                                 | 6.99         | 66 (13.0)                               | 5.76         |
| Sinusitis                              | 8 (4.0)                             | 8.01         | 11 (5.4)                                | 14.97        | 66 (13.0)                               | 7.02         |
| Abdominal pain                         | 12 (6.0)                            | 20.01        | 20 (9.9)                                | 23.96        | 65 (12.8)                               | 5.76         |
| Aspartate aminotransferase increased   | 4 (2.0)                             | 4.00         | 19 (9.4)                                | 20.96        | 65 (12.8)                               | 4.82         |
| Blood creatine phosphokinase increased | 9 (4.5)                             | 9.01         | 19 (9.4)                                | 19.96        | 65 (12.8)                               | 5.57         |
| Dyspnoea                               | 13 (6.5)                            | 15.01        | 5 (2.5)                                 | 4.99         | 59 (11.7)                               | 5.89         |
| Vomiting                               | 10 (5.0)                            | 13.01        | 12 (5.9)                                | 13.97        | 59 (11.7)                               | 5.39         |
| Sinus congestion                       | 8 (4.0)                             | 10.01        | 7 (3.5)                                 | 7.99         | 57 (11.3)                               | 5.83         |
| Influenza                              | 3 (1.5)                             | 3.00         | 14 (6.9)                                | 15.97        | 53 (10.5)                               | 4.07         |

| Preferred Term                     | Study 445-102<br>Placebo<br>N = 201 |              | Study 445-102<br>ELX/TEZ/IVA<br>N = 202 |              | Study 445-105<br>ELX/TEZ/IVA<br>N = 506 |              |
|------------------------------------|-------------------------------------|--------------|-----------------------------------------|--------------|-----------------------------------------|--------------|
|                                    | n (%)                               | Events/100PY | n (%)                                   | Events/100PY | n (%)                                   | Events/100PY |
| Rash                               | 9 (4.5)                             | 12.01        | 19 (9.4)                                | 24.95        | 52 (10.3)                               | 4.57         |
| Productive cough                   | 16 (8.0)                            | 17.01        | 12 (5.9)                                | 11.98        | 50 (9.9)                                | 4.76         |
| Rhinitis                           | 11 (5.5)                            | 14.01        | 15 (7.4)                                | 17.97        | 49 (9.7)                                | 6.70         |
| Back pain                          | 4 (2.0)                             | 5.00         | 5 (2.5)                                 | 4.99         | 47 (9.3)                                | 3.26         |
| Acne                               | 3 (1.5)                             | 3.00         | 7 (3.5)                                 | 6.99         | 45 (8.9)                                | 3.32         |
| Abdominal pain upper               | 6 (3.0)                             | 6.00         | 9 (4.5)                                 | 9.98         | 44 (8.7)                                | 4.01         |
| Bacterial test positive            | 10 (5.0)                            | 13.01        | 5 (2.5)                                 | 4.99         | 42 (8.3)                                | 3.82         |
| Lower respiratory tract congestion | 4 (2.0)                             | 4.00         | 4 (2.0)                                 | 3.99         | 39 (7.7)                                | 3.26         |
| Urinary tract infection            | 0 (0)                               | 0            | 4 (2.0)                                 | 3.99         | 37 (7.3)                                | 2.88         |
| Depression                         | 2 (1.0)                             | 2.00         | 1 (0.5)                                 | 1.00         | 36 (7.1)                                | 2.69         |
| Dizziness                          | 5 (2.5)                             | 7.01         | 7 (3.5)                                 | 6.99         | 36 (7.1)                                | 2.82         |
| Seasonal allergy                   | 2 (1.0)                             | 2.00         | 3 (1.5)                                 | 2.99         | 36 (7.1)                                | 2.76         |
| Pain                               | 0 (0)                               | 0            | 0 (0)                                   | 0            | 33 (6.5)                                | 2.44         |
| Anxiety                            | 1 (0.5)                             | 1.00         | 3 (1.5)                                 | 2.99         | 32 (6.3)                                | 2.63         |
| SARS-CoV-2 test positive           | 0 (0)                               | 0            | 0 (0)                                   | 0            | 32 (6.3)                                | 2.07         |
| Pain in extremity                  | 1 (0.5)                             | 1.00         | 1 (0.5)                                 | 1.00         | 31 (6.1)                                | 2.63         |



| Preferred Term                          | Study 445-102<br>Placebo<br>N = 201 |              | Study 445-102<br>ELX/TEZ/IVA<br>N = 202 |              | Study 445-105<br>ELX/TEZ/IVA<br>N = 506 |              |
|-----------------------------------------|-------------------------------------|--------------|-----------------------------------------|--------------|-----------------------------------------|--------------|
|                                         | n (%)                               | Events/100PY | n (%)                                   | Events/100PY | n (%)                                   | Events/100PY |
| Blood bilirubin increased               | 2 (1.0)                             | 2.00         | 10 (5.0)                                | 10.98        | 30 (5.9)                                | 2.82         |
| Hypoglycaemia                           | 2 (1.0)                             | 2.00         | 9 (4.5)                                 | 8.98         | 30 (5.9)                                | 2.19         |
| Pharyngitis                             | 2 (1.0)                             | 2.00         | 6 (3.0)                                 | 5.99         | 29 (5.7)                                | 2.69         |
| Respiration abnormal                    | 4 (2.0)                             | 4.00         | 9 (4.5)                                 | 9.98         | 29 (5.7)                                | 2.57         |
| Wheezing                                | 2 (1.0)                             | 2.00         | 6 (3.0)                                 | 6.99         | 29 (5.7)                                | 2.63         |
| Insomnia                                | 1 (0.5)                             | 1.00         | 3 (1.5)                                 | 2.99         | 28 (5.5)                                | 2.07         |
| Myalgia                                 | 5 (2.5)                             | 5.00         | 5 (2.5)                                 | 4.99         | 28 (5.5)                                | 2.07         |
| Viral upper respiratory tract infection | 4 (2.0)                             | 4.00         | 9 (4.5)                                 | 11.98        | 28 (5.5)                                | 2.44         |
| Abdominal distension                    | 3 (1.5)                             | 4.00         | 5 (2.5)                                 | 6.99         | 27 (5.3)                                | 2.19         |
| Influenza like illness                  | 2 (1.0)                             | 2.00         | 0 (0)                                   | 0            | 27 (5.3)                                | 2.00         |

*Definition of abbreviation: AE = adverse event; ELX/TEZ/IVA = elexacaftor/tezacaftor/ivacaftor; PY = participant-years;*

SARS-CoV-2 = severe acute respiratory syndrome coronavirus 2.

**Table S3. Summary of Most Common Adverse Events (>15% at Week 144) at Weeks 48, 96, and 144**

|                                                     | Study 445-105 Week 48<br>Interim Analysis |              | Study 445-105 Week 96<br>Interim Analysis |              | Study 445-105 Week 144<br>Interim Analysis |              |
|-----------------------------------------------------|-------------------------------------------|--------------|-------------------------------------------|--------------|--------------------------------------------|--------------|
|                                                     | ELX/TEZ/IVA<br>N = 506                    |              | ELX/TEZ/IVA<br>N = 506                    |              | ELX/TEZ/IVA<br>N = 506                     |              |
|                                                     | Mean Exposure = 37.2 Weeks                |              | Mean Exposure = 105.7 Weeks               |              | Mean Exposure = 151.1 Weeks                |              |
|                                                     | Participants                              | Events/100PY | Participants                              | Events/100PY | Participants                               | Events/100PY |
| Most common adverse events*, n (%)                  |                                           |              |                                           |              |                                            |              |
| Infective pulmonary exacerbation of cystic fibrosis | 127 (25.1)                                | 49.60        | 191 (37.7)                                | 38.69        | 225 (44.5)                                 | 37.40        |
| Cough                                               | 118 (23.3)                                | 44.26        | 183 (36.2)                                | 32.87        | 212 (41.9)                                 | 30.63        |
| Headache                                            | 66 (13.0)                                 | 24.93        | 124 (24.5)                                | 17.73        | 166 (32.8)                                 | 18.29        |
| Oropharyngeal pain                                  | 74 (14.6)                                 | 25.69        | 132 (26.1)                                | 18.90        | 146 (28.9)                                 | 16.85        |
| Nasopharyngitis                                     | 69 (13.6)                                 | 21.62        | 114 (22.5)                                | 16.93        | 135 (26.7)                                 | 17.04        |
| Pyrexia                                             | 44 (8.7)                                  | 12.46        | 95 (18.8)                                 | 11.55        | 134 (26.5)                                 | 12.59        |
| Sputum increased                                    | 63 (12.5)                                 | 20.60        | 100 (19.8)                                | 12.98        | 120 (23.7)                                 | 12.09        |
| Upper respiratory tract infection                   | 60 (11.9)                                 | 18.31        | 99 (19.6)                                 | 13.16        | 111 (21.9)                                 | 11.65        |
| Nasal congestion                                    | 48 (9.5)                                  | 16.79        | 81 (16.0)                                 | 10.93        | 106 (20.9)                                 | 10.08        |
| Fatigue                                             | 51 (10.1)                                 | 16.28        | 80 (15.8)                                 | 11.28        | 104 (20.6)                                 | 11.21        |
| COVID -19                                           | 0 (0)                                     | 0            | 15 (3.0)                                  | 1.70         | 99 (19.6)                                  | 7.70         |

|                          | <b>Study 445-105 Week 48<br/>Interim Analysis</b> |                     | <b>Study 445-105 Week 96<br/>Interim Analysis</b> |                     | <b>Study 445-105 Week 144<br/>Interim Analysis</b> |                     |
|--------------------------|---------------------------------------------------|---------------------|---------------------------------------------------|---------------------|----------------------------------------------------|---------------------|
|                          | <b>ELX/TEZ/IVA<br/>N = 506</b>                    |                     | <b>ELX/TEZ/IVA<br/>N = 506</b>                    |                     | <b>ELX/TEZ/IVA<br/>N = 506</b>                     |                     |
|                          | <b>Mean Exposure = 37.2 Weeks</b>                 |                     | <b>Mean Exposure = 105.7 Weeks</b>                |                     | <b>Mean Exposure = 151.1 Weeks</b>                 |                     |
|                          | <b>Participants</b>                               | <b>Events/100PY</b> | <b>Participants</b>                               | <b>Events/100PY</b> | <b>Participants</b>                                | <b>Events/100PY</b> |
| Nausea                   | 32 (6.3)                                          | 8.65                | 62 (12.3)                                         | 7.25                | 84 (16.6)                                          | 7.77                |
| Diarrhoea                | 38 (7.5)                                          | 10.43               | 65 (12.8)                                         | 7.07                | 80 (15.8)                                          | 6.64                |
| Haemoptysis              | 36 (7.1)                                          | 15.77               | 58 (11.5)                                         | 11.10               | 78 (15.4)                                          | 12.03               |
| Vaccination complication | 0 (0)                                             | 0                   | 16 (3.2)                                          | 1.88                | 78 (15.4)                                          | 9.52                |

\* The most common adverse events that occurred in  $\geq 15\%$  of participants in the Week 144 interim analysis of Study 445-105; listing is according to the preferred term (Medical Dictionary for Regulatory Activities version 24.1).

**Table S4. Liver Function Test Enzyme Elevations and Adverse Events of Elevated Transaminases**

|                                                                                           | Study 445-102<br>Placebo |                           | Study 445-102<br>ELX/TEZ/IVA |                           | Study 445-105<br>ELX/TEZ/IVA |                           |
|-------------------------------------------------------------------------------------------|--------------------------|---------------------------|------------------------------|---------------------------|------------------------------|---------------------------|
|                                                                                           | N = 201                  |                           | N = 202                      |                           | N = 506                      |                           |
|                                                                                           | Participants<br>(%)      | Events/100PY <sup>§</sup> | Participants<br>(%)          | Events/100PY <sup>§</sup> | Participants<br>(%)          | Events/100PY <sup>§</sup> |
| ALT or AST, n (%) <sup>*</sup>                                                            |                          |                           |                              |                           |                              |                           |
| >3 × ULN                                                                                  | 11 (5.5)                 | NA                        | 16 (7.9)                     | NA                        | 57 (11.3)                    | NA                        |
| >5 × ULN                                                                                  | 3 (1.5)                  | NA                        | 5 (2.5)                      | NA                        | 32 (6.3)                     | NA                        |
| >8 × ULN                                                                                  | 2 (1.0)                  | NA                        | 3 (1.5)                      | NA                        | 11 (2.2)                     | NA                        |
| ALT or AST and total<br>bilirubin, n (%) <sup>*</sup>                                     |                          |                           |                              |                           |                              |                           |
| ALT or AST >3 × ULN and<br>total bilirubin >2 × ULN                                       | 0                        | NA                        | 2 (1.0)                      | NA                        | 3 (0.6) <sup>†</sup>         | NA                        |
| Elevated transaminase levels<br>adverse event group term <sup>‡</sup> —<br>n (%)          |                          |                           |                              |                           |                              |                           |
| Any adverse event of<br>elevated transaminase levels                                      | 8 (4.0)                  | 13.01                     | 22 (10.9)                    | 42.92                     | 82 (16.2)                    | 10.43                     |
| Serious adverse events of<br>elevated transaminase levels                                 | 1 (0.5)                  | 1.00                      | 0 (0)                        | 0                         | 6 (1.2)                      | 0.69                      |
| Adverse events of elevated<br>transaminase levels leading<br>to treatment interruption    | 3 (1.5)                  | 4.00                      | 2 (1.0)                      | 2.99                      | 21 (4.2)                     | 2.44                      |
| Adverse events of elevated<br>transaminase levels leading<br>to treatment discontinuation | 0 (0)                    | 0                         | 0 (0)                        | 0                         | 6 (1.2)                      | 0.75                      |
| Time-to-onset of first event,<br>days                                                     |                          |                           |                              |                           |                              |                           |

|                          |             |    |             |    |               |    |
|--------------------------|-------------|----|-------------|----|---------------|----|
| Mean (SD)                | 61.8 (62.7) | -- | 78.4 (63.6) | -- | 384.6 (324.5) | -- |
| Min, Max                 | 1, 169      | -- | 1, 176      | -- | 1, 1097       | -- |
| Duration of events, days |             |    |             |    |               |    |
| Mean (SD)                | 19.6 (14.6) | -- | 32.8 (34.0) | -- | 72.9 (116.3)  | -- |
| Min, Max                 | 5, 52       | -- | 4, 153      | -- | 1, 837        | -- |

*Definition of abbreviations:* ALT = alanine aminotransferase; AST = aspartate aminotransferase; ELX/TEZ/IVA =

elexacaftor/tezacaftor/ivacaftor; NA = not applicable; PY = participant-years; ULN = upper limit of normal.

\* For the liver function test threshold analyses, each percentage is calculated as  $(n/N1) \times 100$ , where the numerator 'n' is the number of participants in the post-Triple-Combination-safety-baseline meeting the indicated threshold, and the denominator (N1) is the number of participants with  $\geq 1$  non-missing measurement during the open-label safety period. For 'ALT or AST', counts are based on the highest value of either test during the treatment-emergent period for each participant. A participant whose highest value is  $>5 \times \text{ULN}$  is also counted as  $>3 \times \text{ULN}$ . A participant whose highest value is  $>8 \times \text{ULN}$  is also counted as  $>3 \times \text{ULN}$  and  $>5 \times \text{ULN}$ .

† Two participants (0.4%) in Study 445-105 had ALT or AST  $>3 \times \text{ULN}$  with concurrent newly occurred bilirubin  $>2 \times \text{ULN}$ . In a third participant, the ALT or AST  $>3 \times \text{ULN}$  and bilirubin  $>2 \times \text{ULN}$  elevations were not concurrent.

‡ Group term of 'elevated transaminase events' included multiple preferred terms.

§ Events per 100 participant-years was calculated by dividing the number of events by the total duration of the safety analysis period in 100 participant-years. 1 year = 48 weeks = 336 days.

**Table S5. Summary of Rash Events\***

|                                                                        | Study 445-102<br>Placebo |              | Study 445-102<br>ELX/TEZ/IVA |              | Study 445-105<br>ELX/TEZ/IVA |              |
|------------------------------------------------------------------------|--------------------------|--------------|------------------------------|--------------|------------------------------|--------------|
|                                                                        | N = 201                  |              | N = 202                      |              | N = 506                      |              |
|                                                                        | Participants<br>(%)      | Events/100PY | Participants<br>(%)          | Events/100PY | Participants<br>(%)          | Events/100PY |
| Any rash event, n (%)                                                  | 13 (6.5)                 | 19.01        | 22 (10.9)                    | 29.95        | 82 (16.2)                    | 7.08         |
| Male, n/N1 (%) <sup>†</sup>                                            | 5/105 (4.8)              | 13.29        | 6/104 (5.8)                  | 15.54        | 33/255 (12.9)                | 5.58         |
| Female, n/N1 (%) <sup>†</sup>                                          | 8/96 (8.3)               | 25.40        | 16/98 (16.3)                 | 45.16        | 49/251 (19.5)                | 8.68         |
| Serious rash event, n (%)                                              | 2 (1.0)                  | 2.00         | 3 (1.5)                      | 2.99         | 2 (0.4)                      | 0.13         |
| Concomitant hormone therapy use, <sup>‡</sup> n/N1 (%) <sup>†</sup>    | 3/32 (9.4)               | 32.84        | 8/40 (20.0)                  | 50.82        | 25/122 (20.5)                | 10.79        |
| No concomitant hormone therapy use, <sup>‡</sup> n/N1 (%) <sup>†</sup> | 5/64 (7.8)               | 21.86        | 8/58 (13.8)                  | 41.33        | 24/129 (18.6)                | 6.64         |
| Time-to-onset of first event, days                                     |                          |              |                              |              |                              |              |
| Mean (SD)                                                              | 51.2 (51.7)              | --           | 36.7 (44.6)                  | --           | 241.2 (268.7)                | --           |
| Min, Max                                                               | 1, 157                   | --           | 5, 157                       | --           | 1, 1120                      | --           |
| Duration of events, days                                               |                          |              |                              |              |                              |              |
| Mean (SD)                                                              | 14.0 (14.4)              | --           | 11.5 (17.0)                  | --           | 21.5 (41.9)                  | --           |
| Min, Max                                                               | 2, 61                    | --           | 1, 92                        | --           | 1, 254                       | --           |

*Definition of abbreviations:* ELX/TEZ/IVA = elexacaftor/tezacaftor/ivacaftor; PY = participant-years.

\* When summarising numbers and percentages of participants, a participant with multiple events within a category is counted only once in that category. Group term of ‘rash events’ includes terms of rash (eg, rash, rash erythematous, rash maculopapular, rash papular, skin exfoliation and urticaria).

<sup>†</sup> For analyses stratified by sex and concomitant hormone therapy use, each percentage is calculated as  $(n/N1) \times 100$ , where the numerator 'n' is the number of participants in the specified subgroup (ie, sex or concomitant hormone therapy use category) with rash events, and the denominator (N1) is the total number of participants in the specified subgroup.

<sup>‡</sup> Hormone therapy included oestrogens and progestogens based on the standard drug groupings using the World Health Organization Drug Dictionary, version March 2021, format B3.

**Table S6. Adverse Events of Blood Creatine Phosphokinase Increased**

|                                                                         | <b>Study 445-102<br/>Placebo</b> |              | <b>Study 445-102<br/>ELX/TEZ/IVA</b> |              | <b>Study 445-105<br/>ELX/TEZ/IVA</b> |              |
|-------------------------------------------------------------------------|----------------------------------|--------------|--------------------------------------|--------------|--------------------------------------|--------------|
|                                                                         | <b>N = 201</b>                   |              | <b>N = 202</b>                       |              | <b>N = 506</b>                       |              |
|                                                                         | Participants (%)                 | Events/100PY | Participants (%)                     | Events/100PY | Participants (%)                     | Events/100PY |
| Any adverse event of blood creatine phosphokinase increased, n (%)      | 9 (4.5)                          | 9.01         | 19 (9.4)                             | 19.96        | 65 (12.8)                            | 5.57         |
| Serious adverse events of blood creatine phosphokinase increased, n (%) | 0 (0)                            | 0            | 0 (0)                                | 0            | 1 (0.2)                              | 0.06         |

*Definition of abbreviations:* ELX/TEZ/IVA = elexacaftor/tezacaftor/ivacaftor; PY = participant-years.



**Table S7. Summary of Blood Pressure Data**

|                                | Study 445-102<br>Placebo |                                  |                                  | Study 445-102<br>ELX/TEZ/IVA |                                  |                                  | Study 445-105<br>ELX/TEZ/IVA |                                  |                                  |
|--------------------------------|--------------------------|----------------------------------|----------------------------------|------------------------------|----------------------------------|----------------------------------|------------------------------|----------------------------------|----------------------------------|
|                                | N = 201                  |                                  |                                  | N = 202                      |                                  |                                  | N = 506                      |                                  |                                  |
|                                | n                        | SBP —<br>mean<br>(SD)<br>(mm Hg) | DBP —<br>mean<br>(SD)<br>(mm Hg) | n                            | SBP —<br>mean<br>(SD)<br>(mm Hg) | DBP —<br>mean<br>(SD)<br>(mm Hg) | n                            | SBP —<br>mean<br>(SD)<br>(mm Hg) | DBP —<br>mean<br>(SD)<br>(mm Hg) |
| Parent study baseline          | 201                      | 113.7<br>(12.1)                  | 69.7<br>(9.4)                    | 202                          | 113.4<br>(11.7)                  | 69.4<br>(9.7)                    | —                            | —                                | —                                |
| Change at Week 24              | 198                      | -0.1<br>(12.4)                   | 0.3 (8.9)                        | 198                          | 3.1<br>(10.8)                    | 1.9<br>(10.2)                    | —                            | —                                | —                                |
| Change at Extended Week<br>144 | —                        | —                                | —                                | —                            | —                                | —                                | 424                          | 3.9<br>(12.5)                    | 2.6 (9.0)                        |

*Definition of abbreviations:* ELX/TEZ/IVA = elexacaftor/tezacaftor/ivacaftor; DBP = diastolic blood pressure; SBP = systolic blood pressure.

Baseline was the parent study baseline, defined as the most recent non-missing measurement before the first dose of study drug in the parent study treatment period.

**Table S8. Adverse Events Related to Blood Pressure\***

|                                    | Study 445-102<br>Placebo<br>N = 201 |              | Study 445-102<br>ELX/TEZ/IVA<br>N = 202 |              | Study 445-105<br>ELX/TEZ/IVA<br>N = 506 |              |
|------------------------------------|-------------------------------------|--------------|-----------------------------------------|--------------|-----------------------------------------|--------------|
|                                    | Participants<br>(%)                 | Events/100PY | Participants<br>(%)                     | Events/100PY | Participants<br>(%)                     | Events/100PY |
| Hypertension                       | 1 (0.5)                             | 1.00         | 0 (0)                                   | 0            | 8 (1.6)                                 | 0.56         |
| Blood pressure increased           | 1 (0.5)                             | 1.00         | 1 (0.5)                                 | 1.00         | 5 (1.0)                                 | 0.44         |
| Diastolic hypertension             | 0 (0)                               | 0            | 0 (0)                                   | 0            | 1 (0.2)                                 | 0.06         |
| Essential hypertension             | 0 (0)                               | 0            | 0 (0)                                   | 0            | 1 (0.2)                                 | 0.06         |
| Blood pressure diastolic increased | 0 (0)                               | 0            | 0 (0)                                   | 0            | 1 (0.2)                                 | 0.06         |
| Hypertensive urgency†              | 0 (0)                               | 0            | 0 (0)                                   | 0            | 1 (0.2)                                 | 0.06         |

*Definition of abbreviations:* ELX/TEZ/IVA = elexacaftor/tezacaftor/ivacaftor; PY = participant-years.

\* All adverse events related to blood pressure were nonserious and did not require change in ELX/TEZ/IVA dosing; 7 participants required medication for elevated blood pressure.

† There was 1 serious AE of hypertensive urgency in a 52-year-old female with type 2 diabetes, chronic kidney disease and a history of hypertension. After approximately 2.5 years in Study 105, she was diagnosed with essential hypertension and cardiomyopathy that was assessed as not related to ELX/TEZ/IVA, and there was no change in study drug.

**Table S9. Annualised Rate of Change in ppFEV<sub>1</sub>\***

|                                                                    | <b>Participants With <i>F/MF</i> Genotypes</b> | <b>Participants With <i>F/F</i> Genotype</b> | <b>All Participants</b> |
|--------------------------------------------------------------------|------------------------------------------------|----------------------------------------------|-------------------------|
| Total number of participants                                       | 392                                            | 105                                          | 497                     |
| Estimate of slope (standard error) per 48 weeks, percentage points | 0.08 (0.11)                                    | 0.03 (0.18)                                  | 0.07 (0.10)             |
| 95% confidence interval                                            | (-0.14 to 0.30)                                | (-0.33 to 0.39)                              | (-0.12 to 0.26)         |

*Definition of abbreviations: F/F = F508del-F508del genotype; F/MF = F508del-minimal function genotypes; ppFEV<sub>1</sub> = per cent predicted forced expiratory volume in 1 second.*

\* Based on the cumulative efficacy period in Study 445-102, Study 445-103 and Study 445-105, up to approximately 151 weeks of follow-up. Includes only post-baseline measurements beyond 21 days from treatment initiation and only participants having  $\geq 3$  non-missing ppFEV<sub>1</sub> records spanning  $\geq 180$  days

**Table S10. Incidence of depression and depression-related adverse events in ELX/TEZ/IVA pivotal phase 3 trial (Study 445-102) and in the ELX/TEZ/IVA pooled clinical trial data\***

| Event                    | Exposure-adjusted event rate (per 100 PY)  |                                                |                                    |                                          |
|--------------------------|--------------------------------------------|------------------------------------------------|------------------------------------|------------------------------------------|
|                          | Pivotal Study 445-102 Placebo N=201 100 PY | Pivotal Study 445-102 ELX/TEZ/IVA N=202 100 PY | Pooled Data Placebo* N=1369 709 PY | Pooled Data ELX/TEZ/IVA** N=1711 3857 PY |
| Any Depression AEs (SMQ) | 5.0                                        | 2.0                                            | 3.24                               | 3.32                                     |
| Suicide attempt          | 0                                          | 0                                              | 0.14                               | 0.08                                     |
| Suicidal ideation        | 1.00                                       | 0                                              | 0.28                               | 0.23                                     |
| Completed suicide        | 0                                          | 0                                              | 0                                  | 0                                        |

*Definition of abbreviations:* AE = adverse event; ELX/TEZ/IVA = elexacaftor/tezacaftor/ivacaftor and ivacaftor; PY = participant years.

\*Placebo column includes data from participants who received placebo in the following 10 completed CFTR modulator studies: 445-102, 659-102, 809-103, 809-104, 661-106, 661-107, and 770-102 (studies in participants 12 years of age and older) and 445-116, 809-109, and 770-103 (studies in participants 6 through 11 years of age).

\*\*ELX/TEZ/IVA column contains data from 14 completed studies in participants 6 years and older. Studies were: 445-102, 445-103, 445-105, 445-104, 445-110, 445-106 Part B, 445-121, 445-001 Part D and Part E, 445-113, 445-117, 445-126, 445-109, 445-115, and 445-116.

## References

1. Kenward MG, Roger JH. Small sample inference for fixed effects from restricted maximum likelihood. *Biometrics* 1997;53:983-997.

## **Data Sharing Statement**

Vertex is committed to advancing medical science and improving participant health. This includes the responsible sharing of clinical trial data with qualified researchers. Proposals for the use of these data will be reviewed by a scientific board. Approvals are at the discretion of Vertex and will be dependent on the nature of the request, the merit of the research proposed and the intended use of the data. Please contact [CTDS@vrtx.com](mailto:CTDS@vrtx.com) if you would like to submit a proposal or need more information.
